# Supplementary material
Source: publisher figshare collection journal article supplement (https://frontiersin.figshare.com/ndownloader/files/13698866)
Supplement: Supplementary file [file 13698866]

## Reduced GDC activity and day/night affect general transcript and metabolite abundances

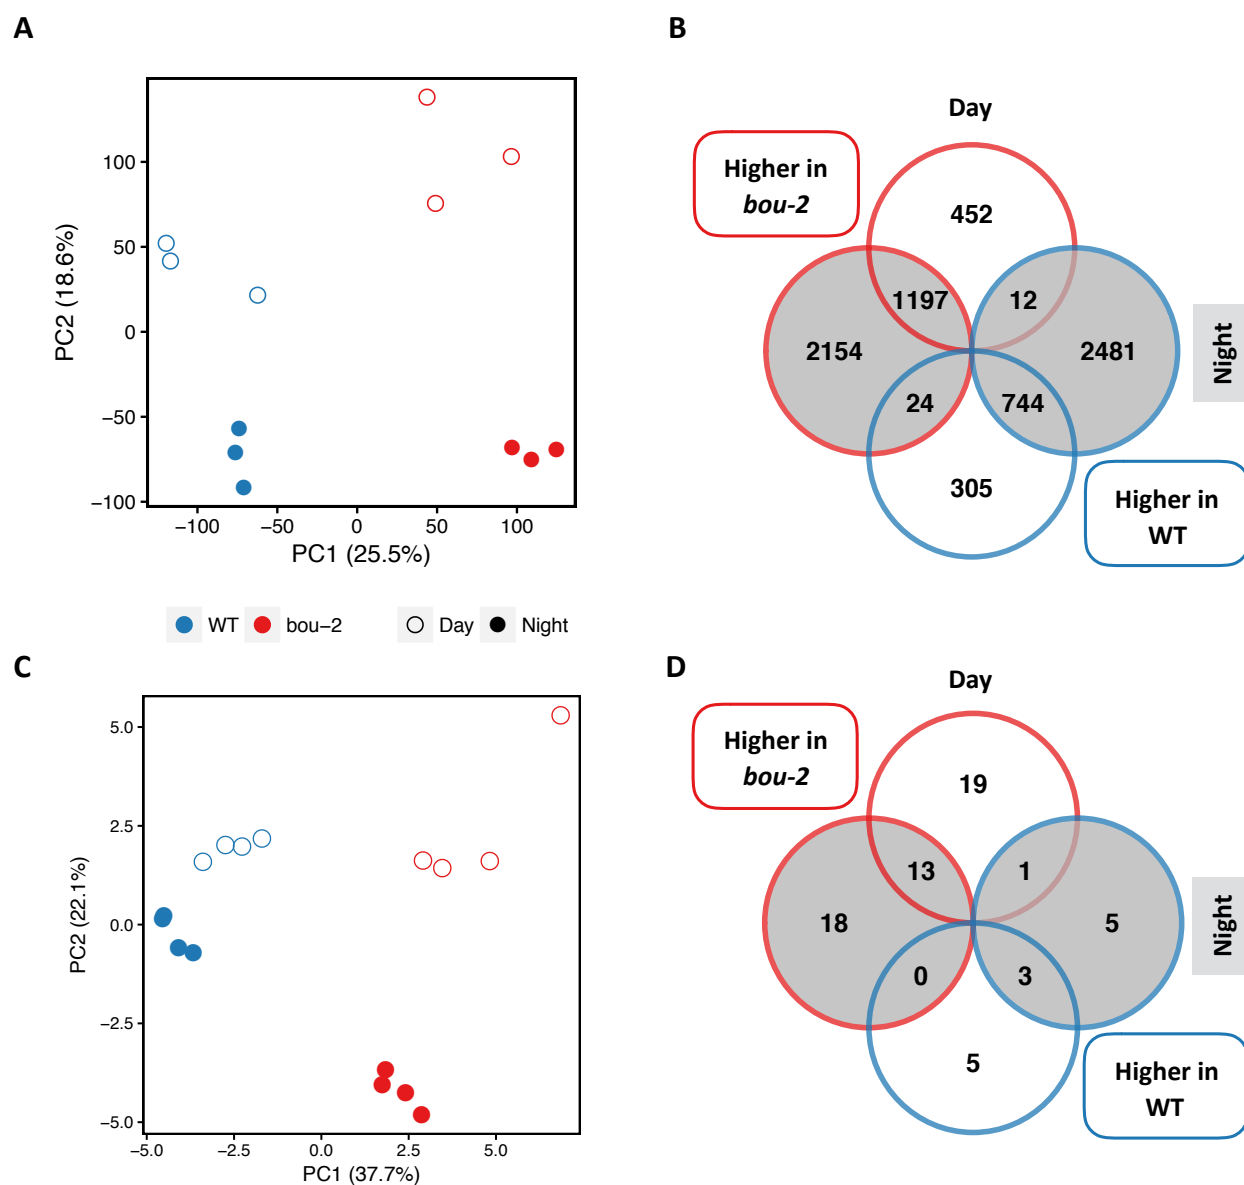

**Supplemental Fig S1.** Differences between the leaf transcriptomes (A and B) and metabolomes (C and D) of WT (blue) and *bou-2* (red) plants. A and C, Principal component analysis (components 1 and 2) of transcript abundances (A) and relative metabolite levels (C) within the three biological replicates. Open circles, day; filled circles, night. B, Venn diagram of genes identified as differentially expressed between WT and *bou-2* at the respective time points (Wald test implemented in sleuth, FDR < 0.01). For details see Supplemental Dataset S1. D, Venn diagram of metabolites identified as differentially abundant between WT and *bou-2* at the respective time points (Student's T-Test,  $p < 0.05$ ).

To assess the global consequences of reduced GDC activity the bou-2 and WT plants were subjected to RNASeq analysis during the day and the night. Statistical analysis using Wald test implemented in sleuth (Pimentel et al., 2016) revealed a clear discrimination of foliar transcripts between the genotypes and times of day with a total of 7,369 differentially expressed transcripts (DEG) at a false-discovery rate of 0.01% ( $FDR < 0.01$ , Suppl. Fig S2 A,B, Supplemental Dataset S1). The number of DEGs was higher at night (6,612 DEGs) compared to day (2,734 DEGs). While 1,197 transcripts were more abundant in bou-2 compared to the wild type (WT) at both times, 2,154 and 452 transcripts were exclusively more abundant at night or day, respectively (Suppl. Fig. S2B). Higher abundance in the WT was detected for 744 transcripts at both times, while 2,481 and 305 transcripts were exclusively more abundant at night or day, respectively.

Principal component analysis (PCA) and venn diagrams were used to compare foliar metabolite abundances between genotypes and times of day. PCA showed a clear discrimination of metabolites between genotypes and times of day (Suppl. Fig. S2C). Venn diagrams identified 64 differentially abundant metabolites between WT and the mutant at day and night (Suppl. Fig. S2D). In general, the metabolites analyzed were more abundant in the mutant than in WT plants. In the mutant, a similar number of metabolites had exclusively higher contents at day or night, while thirteen metabolites were equally abundant at both times (Suppl. Fig. S2D).



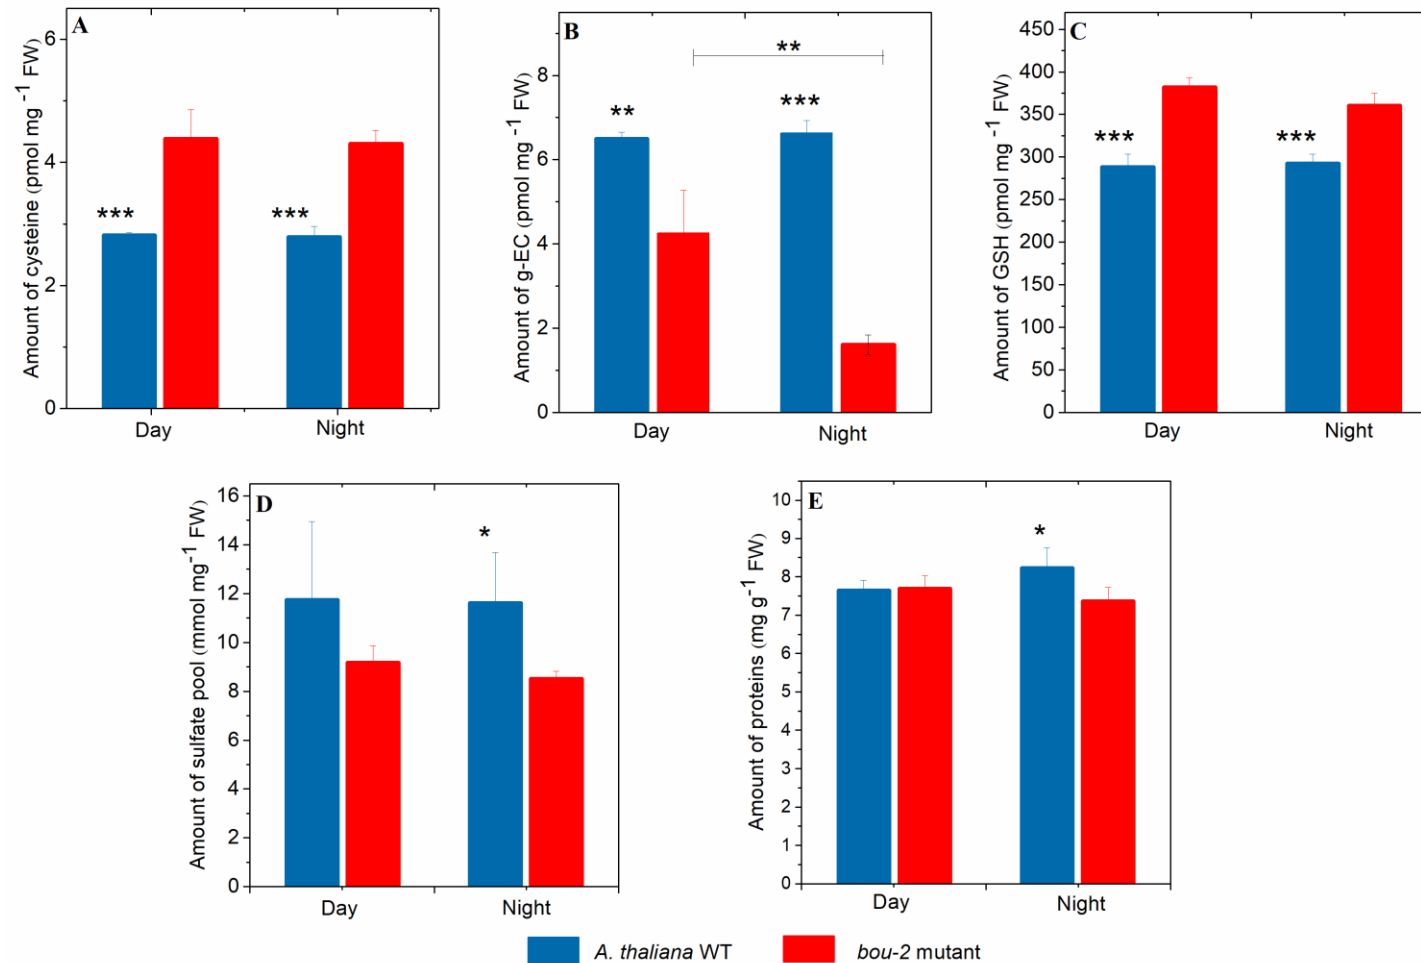

**Supplemental Figure S3.** Foliar content of Cysteine (A),  $\gamma$ -Glutamincysteine ( $\gamma$ -EC) (B), glutathione (GSH) (C) sulfate (D) and proteins (E) of *A. thaliana* WT and the *bou-2* mutant during day and night. Plants were grown at elevated (3000 ppm)  $\text{CO}_2$  and harvested ca. 10 min after light onset and 3h before light onset. Small letters present significant differences between different plant types within same treatment ( $P < 0.05$ ). Asterisks indicate significant differences between day and night within same plant type (\*  $P < 0.05$ , \*\*  $P < 0.01$  and \*\*\*  $P < 0.001$ ). All values are means  $\pm$  standard deviation of 4 replicates.
